# Supplementary material for: Controlling the extent of π-backbonding in platinum(ii) terpyridyl systems: a detailed kinetic, mechanistic and computational approach
Source: Royal Society of Chemistry journal article supplement (doi:10.1039/b809697j), 2008-01-01
Supplement: b809697j.pdf [file b809697j.pdf]

## Controlling the Extent of Pi-Backbonding in Platinum(II) Terpyridyl Systems. A Detailed Kinetic, Mechanistic and Computational Approach

D. Reddy and D. Jaganyi\*

School of Chemistry, University of KwaZulu-Natal, Private Bag X01, Scottsville,  
Pietermaritzburg, 3209, South Africa

### Reaction Scheme

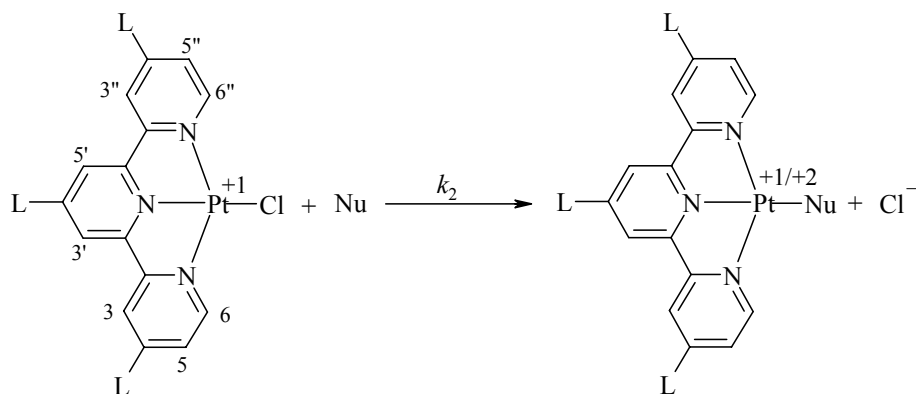

L = H (**Pt1**) or <sup>t</sup>Bu (**Pt2**); Nu = TU, DMTU, TMTU, I<sup>-</sup>, SCN<sup>-</sup>

**Table S1** Summary of selected wavelengths (nm) used in kinetic studies

| Nucleophile      | [Pt(terpy)Cl] <sup>+</sup> ( <b>Pt1</b> ) | [Pt( <sup>t</sup> Bu <sub>3</sub> terpy)Cl] <sup>+</sup> ( <b>Pt2</b> ) |
|------------------|-------------------------------------------|-------------------------------------------------------------------------|
| TU               | 334 <sup>1</sup>                          | 385                                                                     |
| DMTU             | 335 <sup>1</sup>                          | 395                                                                     |
| TMTU             | 409 <sup>1</sup>                          | 415                                                                     |
| I <sup>-</sup>   | 344                                       | 422                                                                     |
| SCN <sup>-</sup> | 290                                       | 389                                                                     |

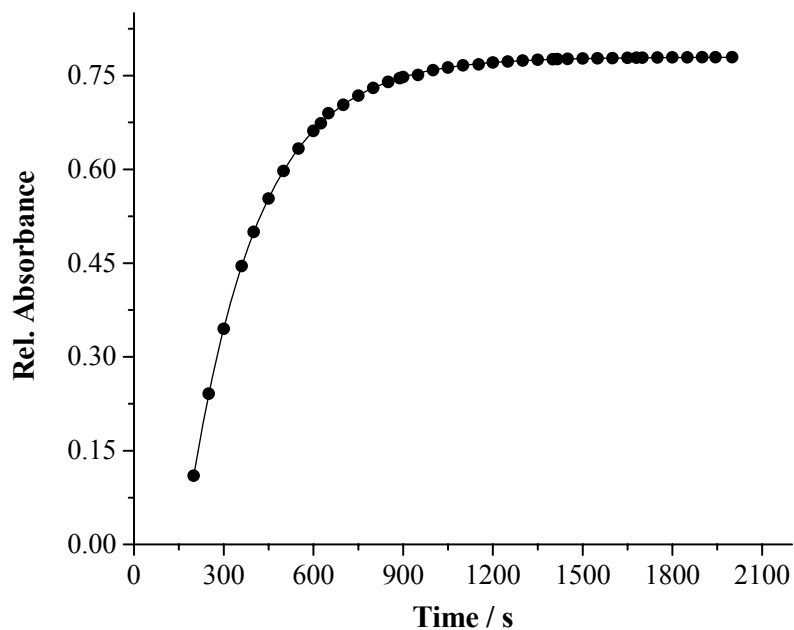

**Figure S1** Kinetic trace and single order exponential fit for the reaction of **Pt2** (0.170 mM) with thiocyanate ( $\text{SCN}^-$ , 1.699 mM) in methanol followed at 389 nm,  $I = 0.1 \text{ M}$  ( $\text{NaClO}_4$ ),  $T = 298.15 \text{ K}$ .

**Table S2** Average observed rate constants,  $k_{\text{obs}}^a$ , at  $25.0^\circ\text{C}$  for reactions of **Pt1** (0.05 mM) with a series of neutral nucleophiles at different nucleophile concentrations.<sup>1</sup>

| [TU] / mM | $k_{\text{obs}} / \text{s}^{-1}$ | [DMTU] / mM | $k_{\text{obs}} / \text{s}^{-1}$ | [TMTU] / mM | $k_{\text{obs}} / \text{s}^{-1}$ |
|-----------|----------------------------------|-------------|----------------------------------|-------------|----------------------------------|
| 0.556     | 0.810                            | 0.555       | 0.234                            | 0.551       | 0.066                            |
| 1.111     | 1.644                            | 1.110       | 0.501                            | 1.110       | 0.096                            |
| 1.667     | 2.568                            | 1.664       | 0.683                            | 1.665       | 0.137                            |
| 2.223     | 3.295                            | 2.219       | 0.982                            | 2.220       | 0.161                            |
| 2.779     | 4.135                            | 2.774       | 1.289                            | 2.775       | 0.238                            |

<sup>a</sup> Taken as an average of at least 6 kinetic runs with a SD between 0.3 and 5%.

**Table S3** Average observed rate constants,  $k_{\text{obs}}^a$ , at 25.0°C for reactions of **Pt1** (13.3  $\mu\text{M}$  ( $\text{I}^-$ ); 14.6  $\mu\text{M}$  ( $\text{SCN}^-$ )) with a series of ionic nucleophiles at different nucleophile concentrations

| $[\text{I}^-] / \text{mM}$ | $k_{\text{obs}} / \text{s}^{-1}$ | $[\text{SCN}^-] / \text{mM}$ | $k_{\text{obs}} / \text{s}^{-1}$ |
|----------------------------|----------------------------------|------------------------------|----------------------------------|
| 0.137                      | 0.0268                           | 0.148                        | $2.247 \times 10^{-3}$           |
| 0.274                      | 0.0621                           | 0.296                        | $4.747 \times 10^{-3}$           |
| 0.410                      | 0.0991                           | 0.444                        | $7.556 \times 10^{-3}$           |
| 0.547                      | 0.132                            | 0.592                        | 0.0103                           |
| 0.684                      | 0.170                            | 0.740                        | 0.0129                           |

<sup>a</sup> Taken as an average of 10 kinetic runs with a SD between 0.3 and 5%.

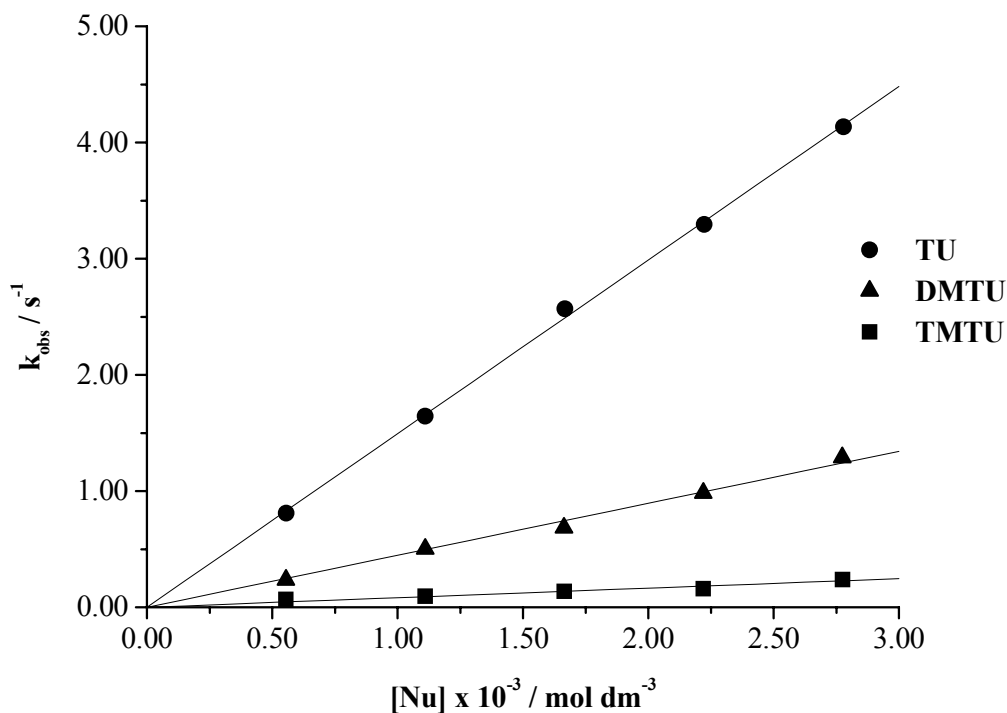

**Figure S2** Dependence of the pseudo first-order rate constants ( $k_{\text{obs}}$ ) on the entering nucleophile concentration for chloride substitution on Pt1 (0.05 mM) in methanol,  $I = 0.1 \text{ M}$  ( $\text{LiCF}_3\text{SO}_3$ ),  $T = 298.15 \text{ K}$ .<sup>1</sup>

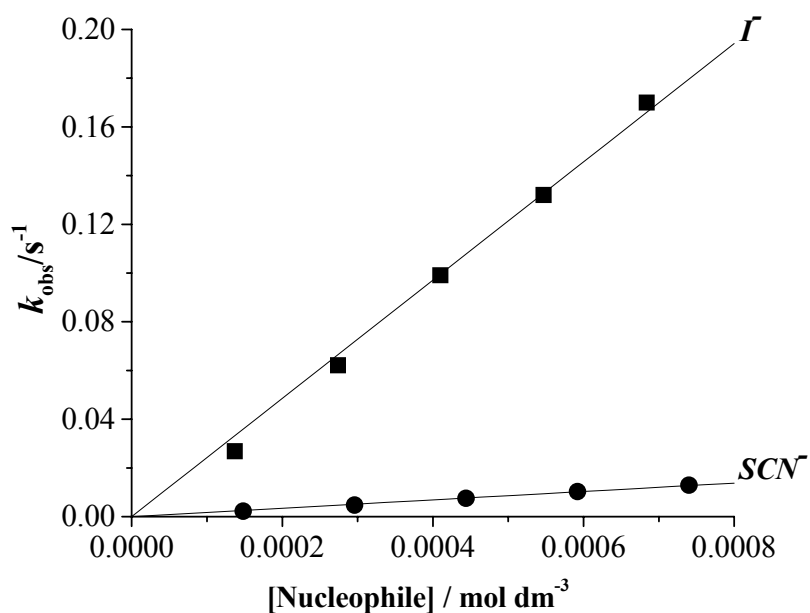

**Figure S3** Dependence of the pseudo first-order rate constants ( $k_{\text{obs}}$ ) on the entering nucleophile concentration for chloride substitution on Pt1 (13.3  $\mu\text{M}$  ( $\text{I}^-$ ); 14.6  $\mu\text{M}$  ( $\text{SCN}^-$ )) in methanol,  $I = 0.1 \text{ M}$  ( $\text{LiCF}_3\text{SO}_3$ ),  $T = 298.15 \text{ K}$ .

**Table S4** Average observed rate constants,  $k_{\text{obs}}^a$ , at 25.0°C for reactions of **Pt2** (ca. 0.165 mM (TU, DMTU, TMTU); 0.170 mM (I, SCN<sup>-</sup>)) with a series of neutral and ionic nucleophiles at different nucleophile concentrations.

| [TU]<br>(mM) | $k_{\text{obs}} / \text{s}^{-1}$ | [DMTU]<br>(mM) | $k_{\text{obs}} / \text{s}^{-1}$ | [TMTU]<br>(mM) | $k_{\text{obs}} / \text{s}^{-1}$ | [I]<br>(mM) | $k_{\text{obs}} / \text{s}^{-1}$ | [SCN <sup>-</sup> ]<br>(mM) | $k_{\text{obs}} / \text{s}^{-1}$ |
|--------------|----------------------------------|----------------|----------------------------------|----------------|----------------------------------|-------------|----------------------------------|-----------------------------|----------------------------------|
| 1.625        | 0.674                            | 1.615          | 0.239                            | 1.641          | 0.0598                           | 1.709       | 0.0978                           | 1.699                       | $4.331 \times 10^{-3}$           |
| 3.250        | 1.401                            | 3.229          | 0.487                            | 3.282          | 0.121                            | 3.418       | 0.200                            | 3.397                       | $9.361 \times 10^{-3}$           |
| 4.875        | 2.172                            | 4.844          | 0.707                            | 4.923          | 0.184                            | 5.128       | 0.304                            | 5.096                       | 0.0145                           |
| 6.500        | 2.969                            | 6.458          | 0.988                            | 6.564          | 0.248                            | 6.837       | 0.407                            | 6.794                       | 0.0195                           |
| 8.125        | 3.717                            | 8.073          | 1.236                            | 8.205          | 0.312                            | 8.546       | 0.518                            | 8.493                       | 0.0248                           |

<sup>a</sup>Taken as an average of 10 kinetic runs with a SD between 0.3 and 5%.

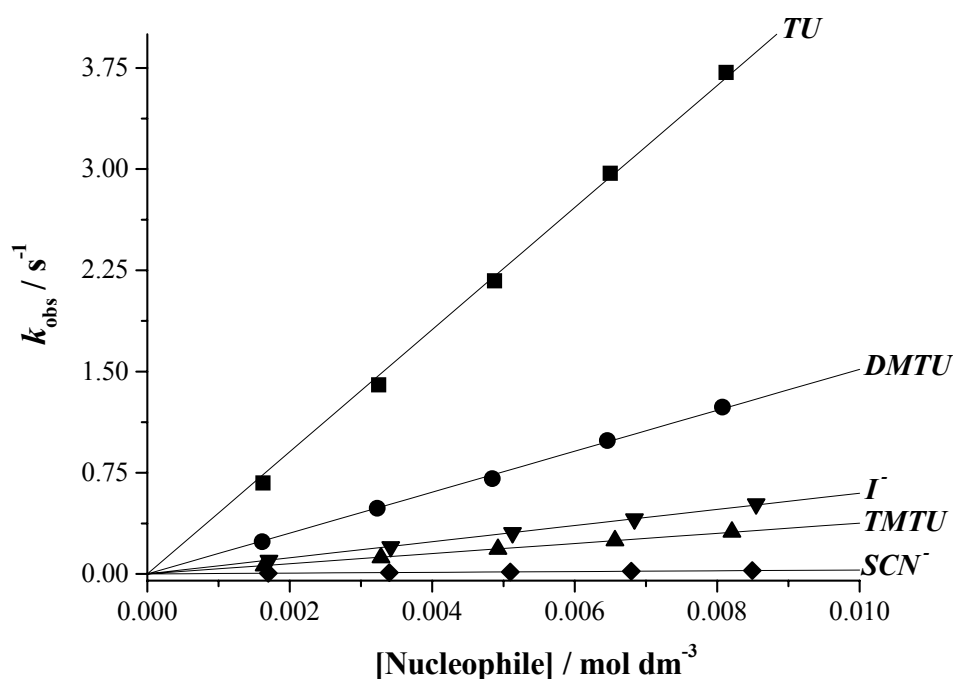

**Figure S4** Dependence of the pseudo first-order rate constants ( $k_{\text{obs}}$ ) on the entering nucleophile concentration for chloride substitution on **Pt2** (ca. 0.170 mM) in methanol,  $I = 0.1$  M ( $\text{NaClO}_4$ ),  $T = 298.15$  K.

**Table S5** Average observed rate constants,  $k_{\text{obs}}^a$ , at varied temperatures for reactions of **Pt1** (0.05 mM) with a series of different nucleophiles whilst maintaining nucleophile concentrations at  $\approx 30$ x [Pt1]. [TU] = 1.67 mM; [DMTU] = 1.66 mM, [TMTU] = 1.66 mM.<sup>1</sup>

| T (K)  | TU, $k_{\text{obs}}(\text{s}^{-1})$ | DMTU, $k_{\text{obs}}(\text{s}^{-1})$ | TMTU, $k_{\text{obs}}(\text{s}^{-1})$ |
|--------|-------------------------------------|---------------------------------------|---------------------------------------|
| 288.15 | 1.569                               | 0.411                                 | 0.087                                 |
| 293.15 | 2.026                               | 0.531                                 | 0.108                                 |
| 298.15 | 2.568                               | 0.683                                 | 0.137                                 |
| 303.15 | 2.934                               | 0.947                                 | 0.195                                 |
| 308.15 | 3.754                               | 1.171                                 | 0.231                                 |

<sup>a</sup> Taken as an average of at least 6 kinetic runs with a SD between 0.1 and 2%.

**Table S5** Average observed rate constants,  $k_{\text{obs}}^a$ , at varied temperatures for reactions of **Pt1** (13.3  $\mu\text{M}$  ( $\text{I}^-$ ); 14.6  $\mu\text{M}$  ( $\text{SCN}^-$ )) with a series of ionic nucleophiles whilst maintaining nucleophile concentrations at  $\approx 30x$  [Pt1].  $[\text{I}^-] = 0.410$  mM;  $[\text{SCN}^-] = 0.444$  mM.

| T (K) | I, $k_{\text{obs}}(\text{s}^{-1})$ | SCN <sup>-</sup> , $k_{\text{obs}}(\text{s}^{-1})$ |
|-------|------------------------------------|----------------------------------------------------|
| 288.3 | 0.0500                             | $3.756 \times 10^{-3}$                             |
| 293.2 | 0.0695                             | $5.312 \times 10^{-3}$                             |
| 298.2 | 0.0991                             | $7.556 \times 10^{-3}$                             |
| 303.2 | 0.137                              | 0.0105                                             |
| 308.2 | -                                  | 0.0146                                             |

<sup>a</sup> Taken as an average of 10 kinetic runs with a SD between 0.1 and 2%.

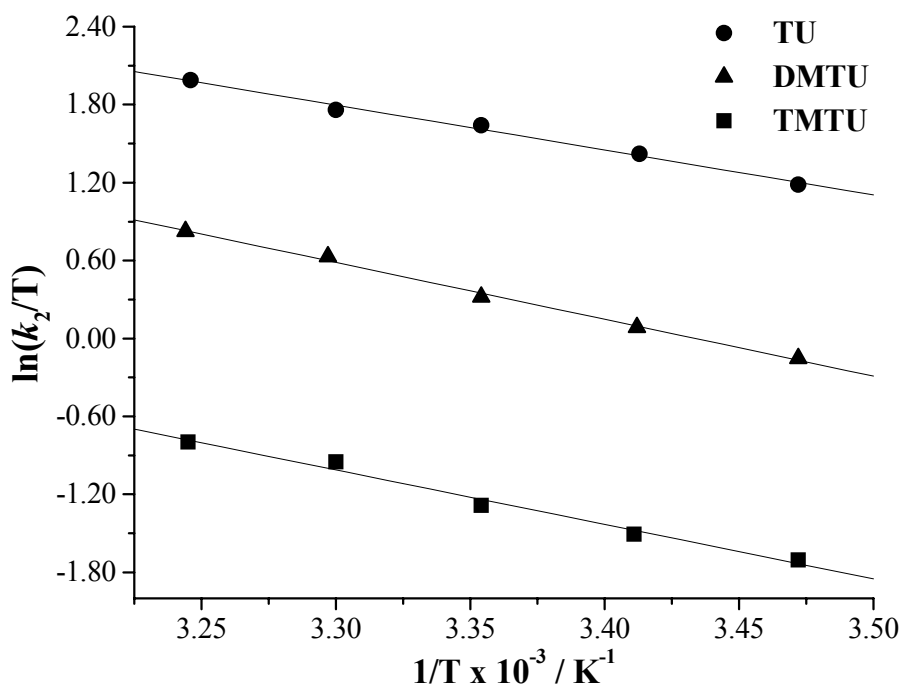

**Figure S5** Plots of  $\ln(k_2/T)$  versus  $1/T$  for the reaction of **Pt1** (0.05 mM) with a series of neutral nucleophiles at various temperatures in the temperature range 15 to 35 °C whilst maintaining nucleophile concentrations at  $\approx 30x$  [Pt1].<sup>1</sup>

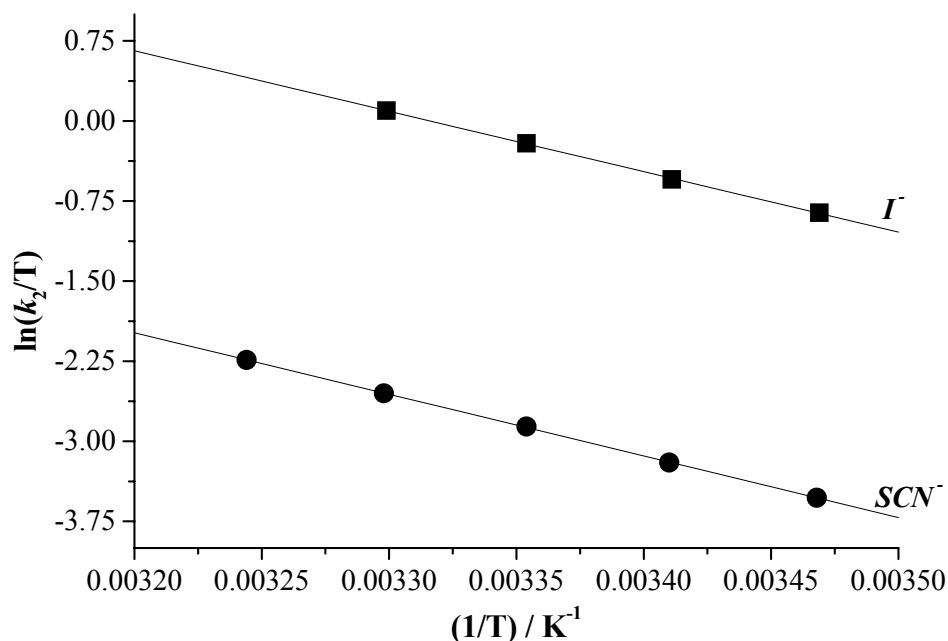

**Figure S6** Plots of  $\ln(k_2/T)$  versus  $1/T$  for the reaction of **Pt1** ( $13.3 \mu\text{M}$  ( $\text{I}^-$ );  $14.6 \mu\text{M}$  ( $\text{SCN}^-$ )) with the ionic nucleophiles at various temperatures in the temperature range  $15$  to  $35 \text{ }^\circ\text{C}$  whilst maintaining nucleophile concentrations at  $\approx 30x$   $[\text{Pt1}]$ .

**Table S5** Average observed rate constants,  $k_{\text{obs}}^a$ , at varied temperatures for reactions of **Pt2** ( $0.170 \text{ mM}$ ) with a series of different nucleophiles whilst maintaining nucleophile concentrations at  $\approx 30x$   $[\text{Pt2}]$ .  $[\text{TU}] = 4.875 \text{ mM}$ ;  $[\text{DMTU}] = 4.844 \text{ mM}$ ,  $[\text{TMTU}] = 4.923 \text{ mM}$ ,  $[\text{I}^-] = 5.128$ ,  $[\text{SCN}^-] = 5.096 \text{ mM}$ .

| T (K)  | TU<br>$k_{\text{obs}}(\text{s}^{-1})$ | DMTU<br>$k_{\text{obs}}(\text{s}^{-1})$ | TMTU<br>$k_{\text{obs}}(\text{s}^{-1})$ | $\text{I}^-$<br>$k_{\text{obs}}(\text{s}^{-1})$ | $\text{SCN}^-$<br>$k_{\text{obs}}(\text{s}^{-1})$ |
|--------|---------------------------------------|-----------------------------------------|-----------------------------------------|-------------------------------------------------|---------------------------------------------------|
| 288.15 | 1.318                                 | 0.387                                   | 0.107                                   | 0.150                                           | $6.366 \times 10^{-3}$                            |
| 293.15 | 1.698                                 | 0.507                                   | 0.141                                   | 0.214                                           | $9.740 \times 10^{-3}$                            |
| 298.15 | 2.172                                 | 0.707                                   | 0.184                                   | 0.304                                           | 0.0145                                            |
| 303.15 | 2.772                                 | 0.938                                   | 0.235                                   | 0.428                                           | 0.0215                                            |
| 308.15 | 3.516                                 | 1.188                                   | 0.300                                   | 0.596                                           | 0.0316                                            |

<sup>a</sup>Taken as an average of 10 kinetic runs with a SD between 0.1 and 2%.



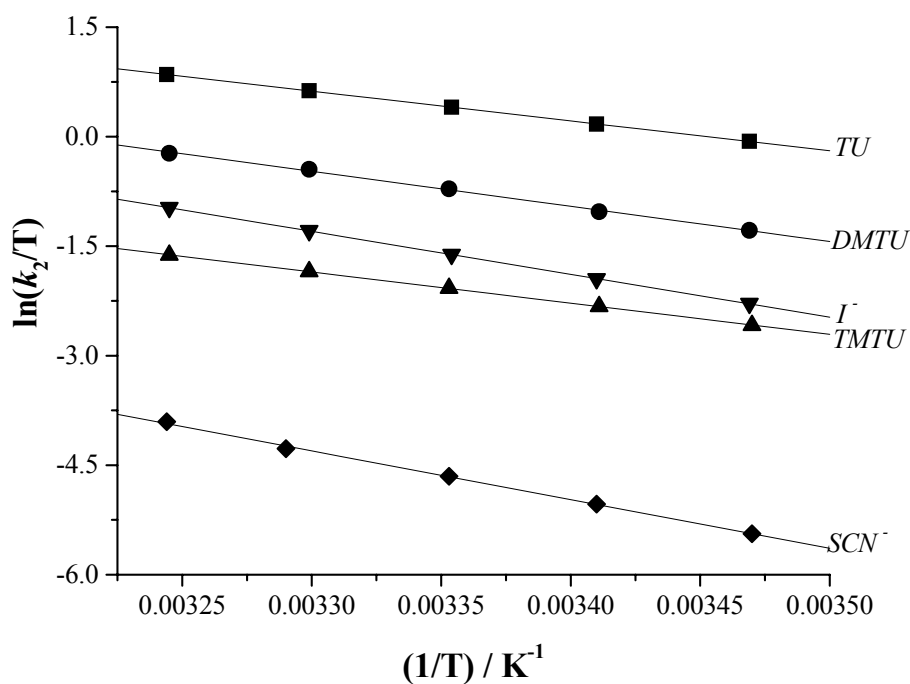

**Figure S7** Plots of  $\ln(k_2/T)$  versus  $1/T$  for the reaction of **Pt2** (0.170 mM) with a series of neutral and ionic nucleophiles at various temperatures in the temperature range 15 to 35 °C whilst maintaining nucleophile concentrations at  $\approx 30x$  [Pt2].

**Table S6** Energies of the LUMO and LUMO + 1 for terpy derivatives, as calculated by Cummings *et al.*<sup>2</sup>

| Compound                           | LUMO (eV) | LUMO + 1 (eV) |
|------------------------------------|-----------|---------------|
| <sup>t</sup> Bu <sub>3</sub> terpy | -0.74     | -0.37         |
| terpy                              | -0.82     | -0.44         |
| Cl-terpy                           | -0.97     | -0.58         |
| Cl <sub>3</sub> -terpy             | -1.15     | -0.77         |

**Table S7** Correlation of observed X-ray data with DFT-calculated data for the complexes  $[\text{Pt}(\text{terpy})(\text{OMe})]^+$  and  $[\text{Pt}(\text{tBu}_3\text{terpy})\text{Cl}]^+$ .<sup>3,4</sup>

| Complex                                            | Bond Lengths (Calcd., Obsd.) / Å |                         |                         |              |
|----------------------------------------------------|----------------------------------|-------------------------|-------------------------|--------------|
|                                                    | <i>Pt-N<sub>1</sub></i>          | <i>Pt-N<sub>2</sub></i> | <i>Pt-N<sub>3</sub></i> | <i>Pt-O</i>  |
| $[\text{Pt}(\text{terpy})(\text{OMe})]^+$          | 1.98, 1.92                       | 2.05, 2.10              | 2.05, 2.04              | 2.00, 2.00   |
| $[\text{Pt}(\text{tBu}_3\text{terpy})\text{Cl}]^+$ | 1.963, 1.935                     | 2.050, 2.020            | 2.050, 2.025            | 2.352, 2.288 |

**Figure S8** Infrared spectrum of  $[\text{Pt}(\text{tBu}_3\text{terpy})\text{Cl}]\text{ClO}_4$  (**Pt2**) in KBr.

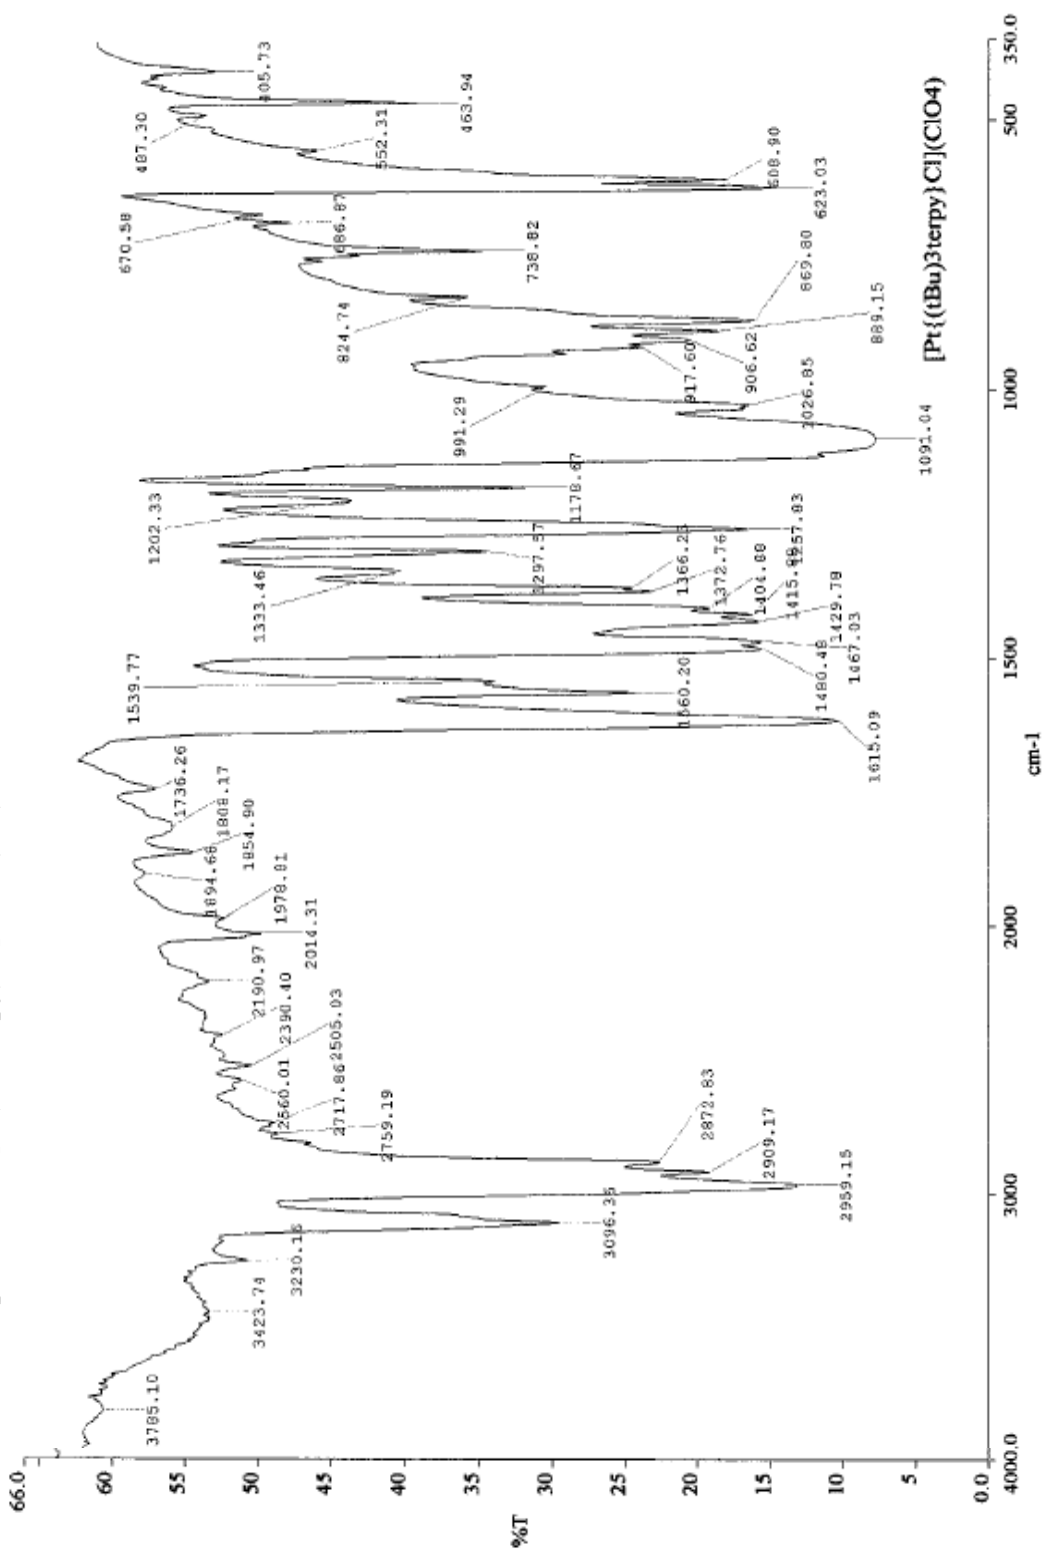

**Figure S9**  $^1\text{H-NMR}$  Spectrum of  $[\text{Pt}(\text{Bu}_3\text{terpy})\text{Cl}]\text{ClO}_4$  (**Pt2**) in  $\text{CD}_3\text{CN}$

DR\_18W3Tpy\_C101 in CD3CN  
Pulse Sequence: s2pul

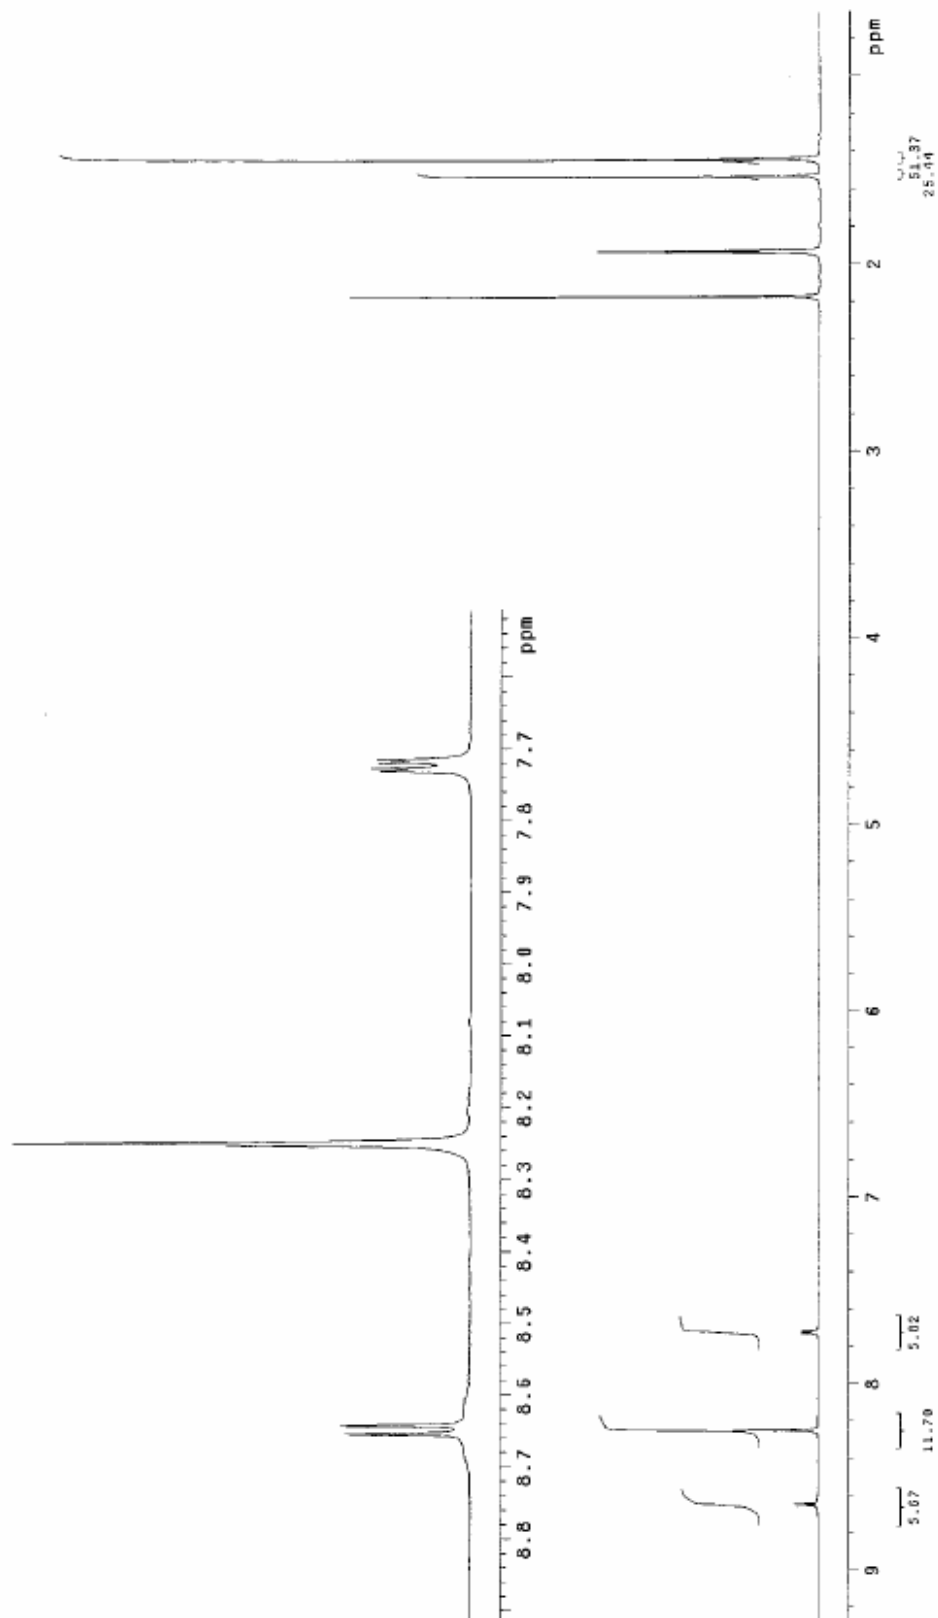

**Figure S10**  $^{13}\text{C}$ -NMR Spectrum of  $[\text{Pt}(\text{Bu}_3\text{terpy})\text{Cl}]\text{ClO}_4$  (**Pt2**) in  $\text{CD}_3\text{CN}$

DR\_TB031py\_C104 in CD3CN  
Pulse Sequence: g2pu1

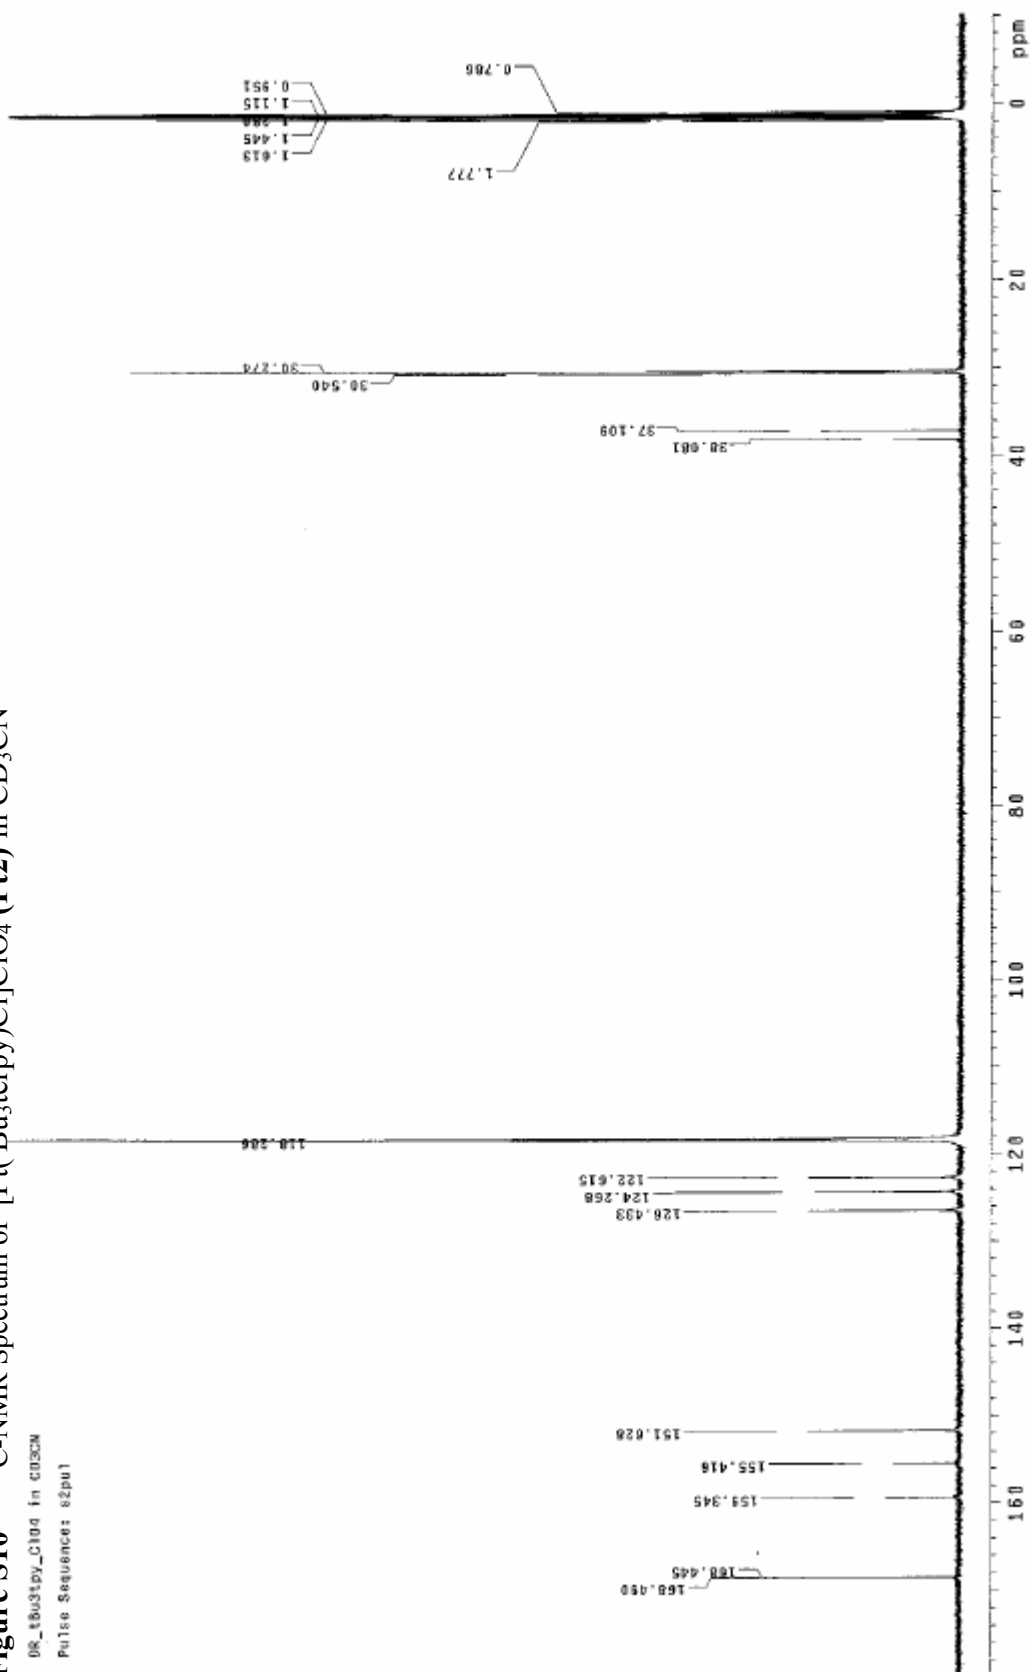

**Figure S11**  $^{195}\text{Pt}$ -NMR Spectrum of  $[\text{Pt}(\text{tBu}_3\text{terpy})\text{Cl}]\text{ClO}_4$  (**Pt2**) in  $\text{CD}_3\text{CN}$

IR\_tBu3tpy\_C104 in COSY  
Pulse Sequence: szpu1

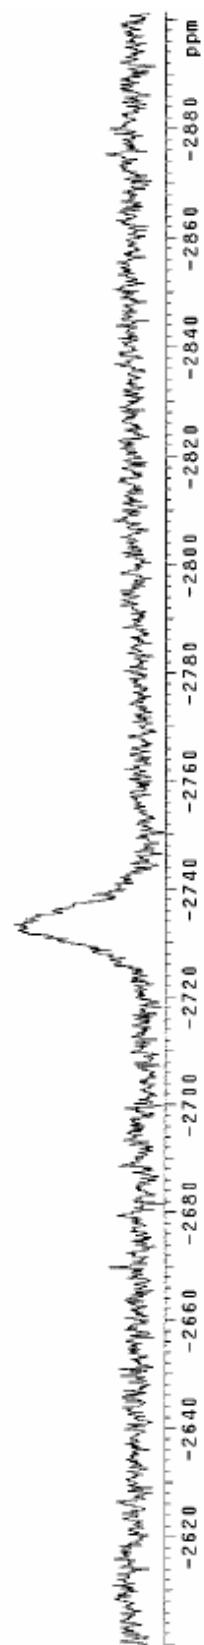

## References

1. D. Jaganyi, D. Reddy, J. A. Gertenbach, A. Hofmann and R. van Eldik, R., *Dalton Trans.*, 2004, 299
2. S. E. Hobert, J. T. Carney and S. D. Cummings, *Inorg. Chim. Acta.*, 2001, **318**, 89
3. S.-W. Lai, M. C. W. Chan, K.-K. Cheung and C.-M. Che, *Inorg. Chem.*, 1998, **38**, 4262.
4. T. K. Aldrige, E. M. Stacy and D. R. McMillin, *Inorg. Chem.*, 1994, **33**, 722.
